# Supplementary material for: Surface chemical functionalization of single walled carbon nanotubes with a bacteriorhodopsin mutant
Source: Royal Society of Chemistry journal article supplement (doi:10.1039/c2nr31999c), 2012-01-01
Supplement: c2nr31999c.pdf [file c2nr31999c.pdf]

# Supporting Information of Surface chemical functionalization of Single Walled Carbon Nanotubes with a Bacteriorhodopsin mutant

Chiara Ingrosso,<sup>a,b,§</sup> Giuseppe Valerio Bianco,<sup>c</sup>  
Patrizia Lopalco,<sup>a</sup> Michela Tamborra,<sup>b</sup> Maria  
Lucia Curri,<sup>b</sup> Angela Corcelli,<sup>d</sup> Giovanni Bruno,<sup>c</sup>  
Angela Agostiano,<sup>b,e</sup> Pietro Siciliano<sup>a</sup> and  
Marinella Striccoli<sup>b</sup>

Figure S1 compares the absorption spectra of PM-D96N in aqueous solution at pH 7 before and after the sonication and in aqueous buffers at pH 5, 7.5 and 9.

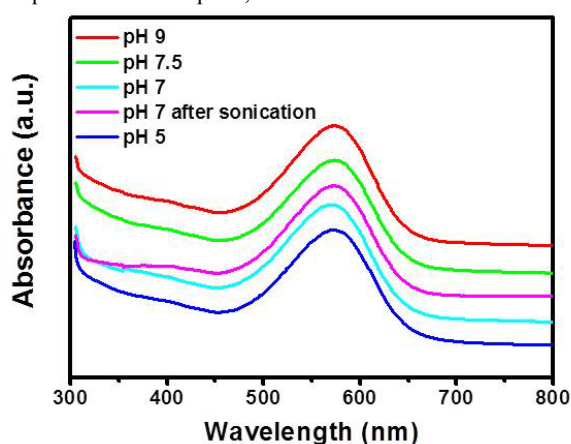

Figure S1. UV-vis absorption spectra of PM-D96N in aqueous solution at pH 7 before and after sonication and in buffers at pH 5, 7.5 and 9.

40 Figure S2 shows the raman spectrum of SWNTs sonicated with PM-D96N in buffer at pH 7.5. In the figure the typical raman mode of the crystalline silicon substrate at  $520\text{ cm}^{-1}$ , which has been used for calibration, can be observed.

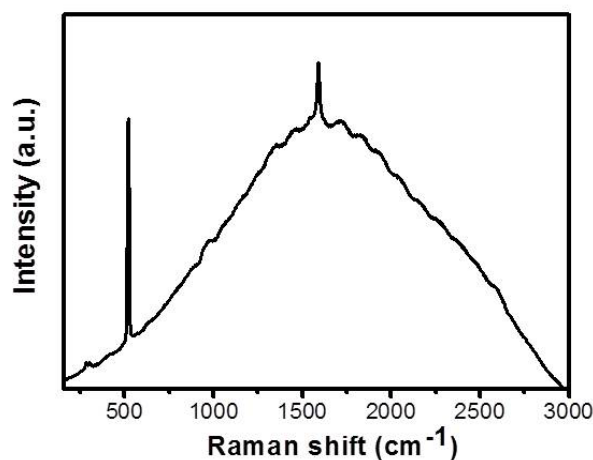

45 Figure S2. Raman spectrum of SWNTs sonicated with PM-D96N in buffer at pH 7.5.

50

15

20

25

30

35
